# Supplementary material for: Synthesis and chemosensory properties of two-arm truxene-functionalized conjugated polyfluorene containing terpyridine moiety
Source: Royal Society of Chemistry journal article supplement (doi:10.1039/c6ra15965f), 2016-01-01
Supplement: c6ra15965f1.pdf [file c6ra15965f1.pdf]

Supporting information for

**Synthesis and chemosensory properties of two-arm truxene-functionalized conjugated polyfluorene containing terpyridine moiety**

*Po-Chih Yang\*, Hua-Wen Wen, Chih-Wei Huang and Yi-Ning Zhu*

Department of Chemical Engineering and Materials Science, Yuan Ze University, Chung-Li, Taoyuan City 32003, Taiwan

*E-mail address:* pcyang@saturn.yzu.edu.tw (P.-C. Yang).

Tel: +886 3 4638800 Ext. 3556, Fax: +886 3 4559373

**Table of Contents**

- 1.  $^1\text{H}$  NMR spectra of M1 and P1**
- 2.  $^{13}\text{C}$  NMR spectra of intermediates 1 and 5**
- 3. FABMS spectra of intermediate 1 and monomer M1**
- 4. Cyclic voltammogram of P1**
- 5. Typical optimized structure, HOMO, and LUMO**

# 1. $^1\text{H}$ NMR spectra of M1 and P1

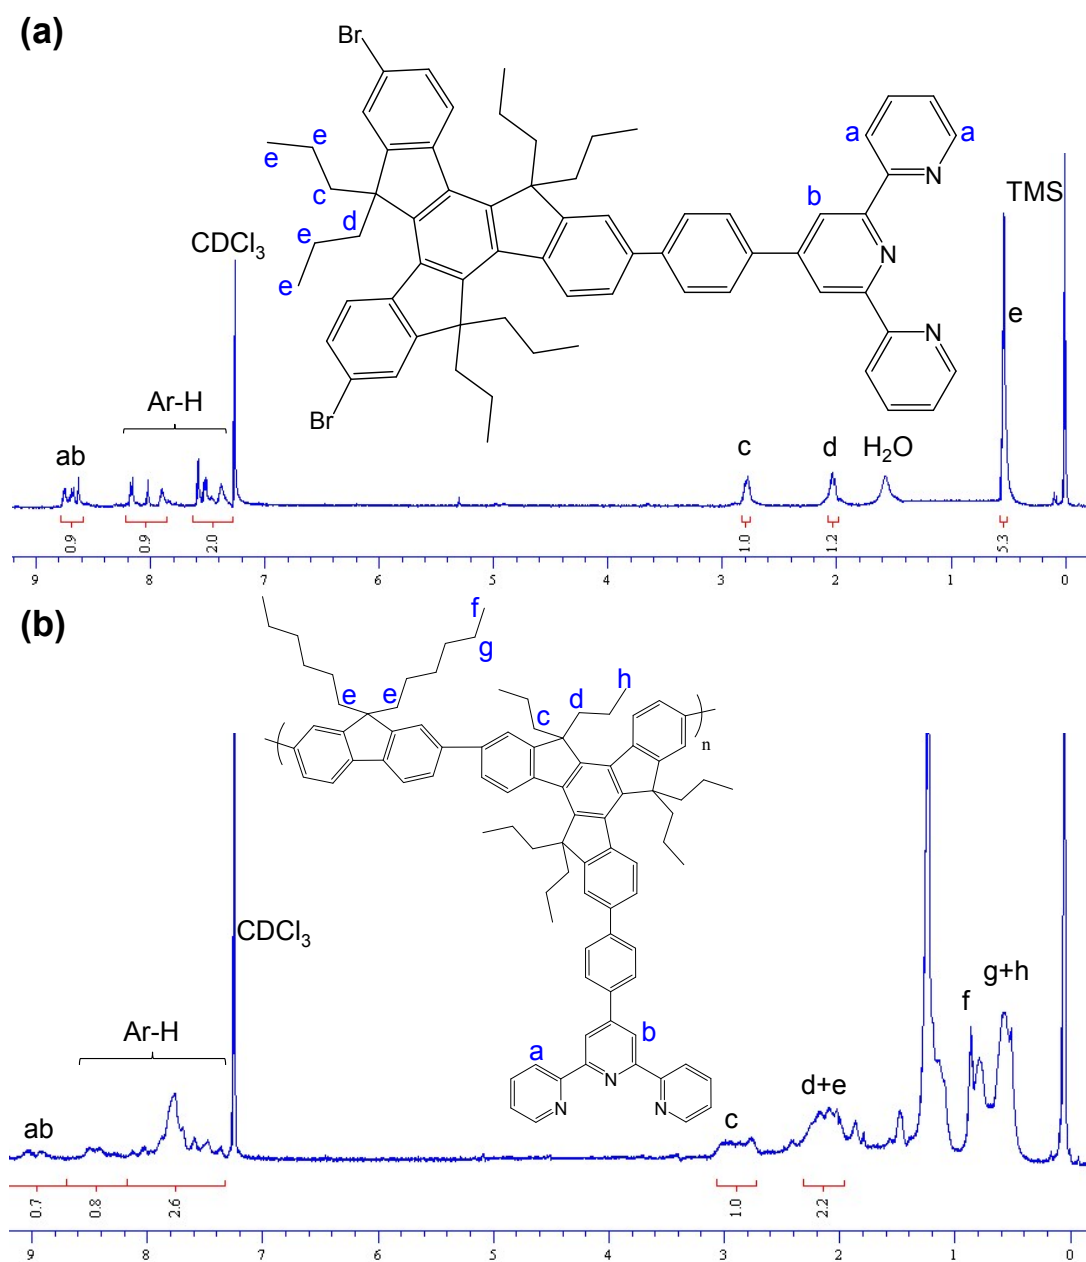

Fig. S1  $^1\text{H}$  NMR spectra of (a) M1 and (b) P1.

## 2. $^{13}\text{C}$ NMR spectra of intermediates 1 and 5

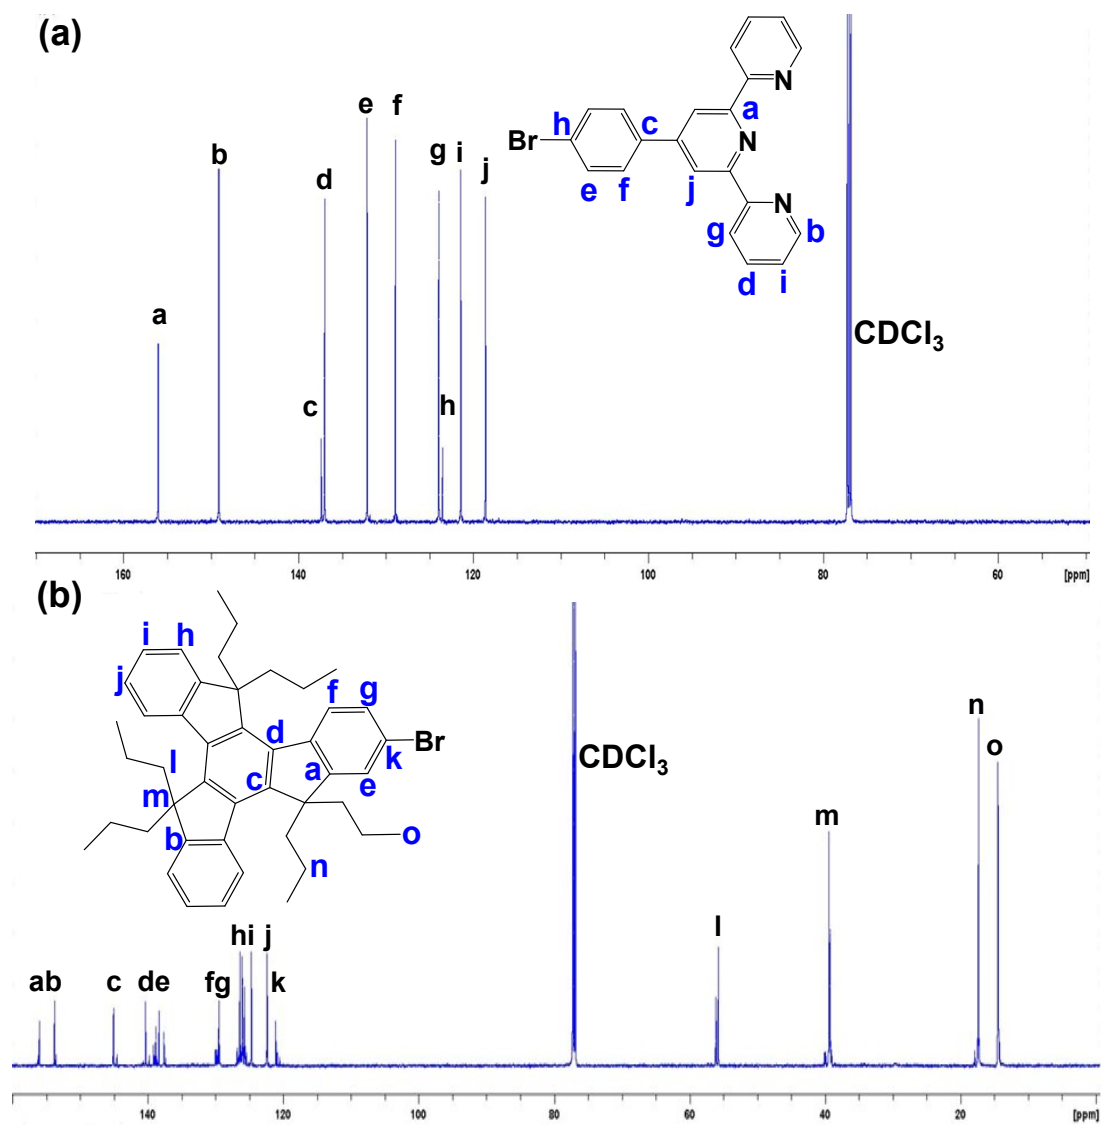

Fig. S2  $^{13}\text{C}$  NMR spectra of intermediates (a) 1 and (b) 5.

### 3. FABMS spectra of intermediate 1 and monomer M1

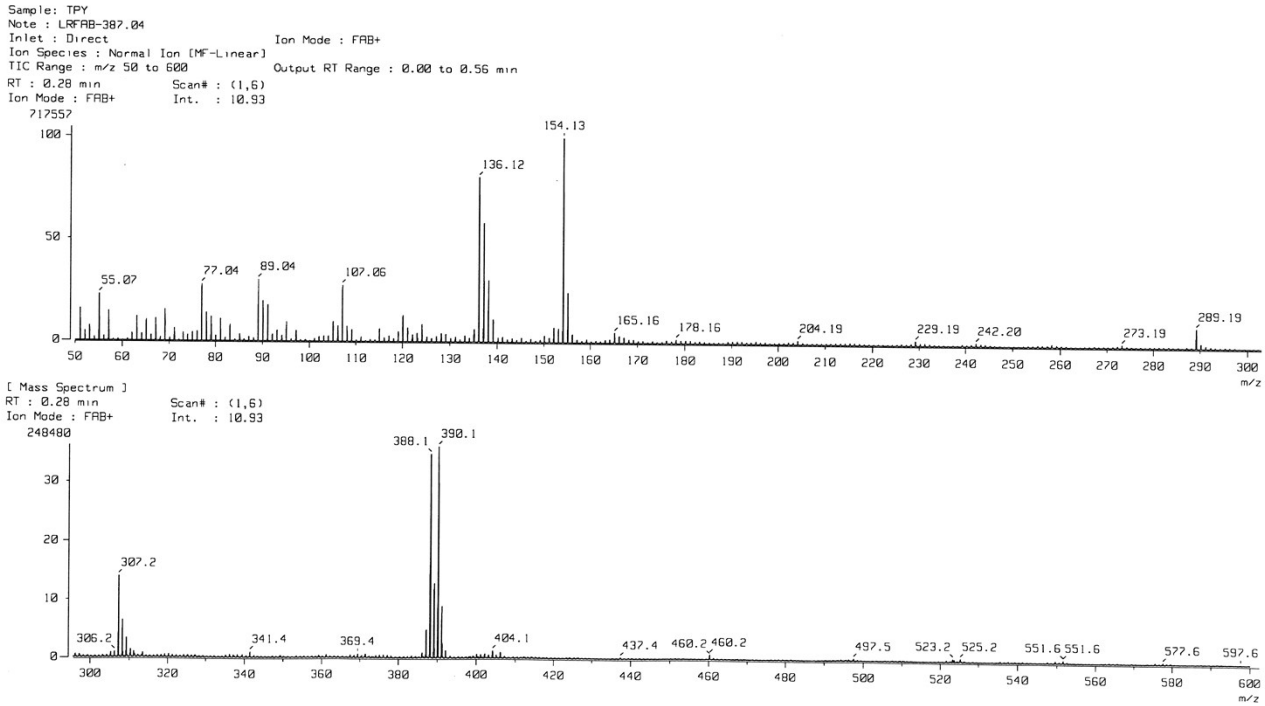

Fig. S3 FABMS spectrum of intermediate 1.

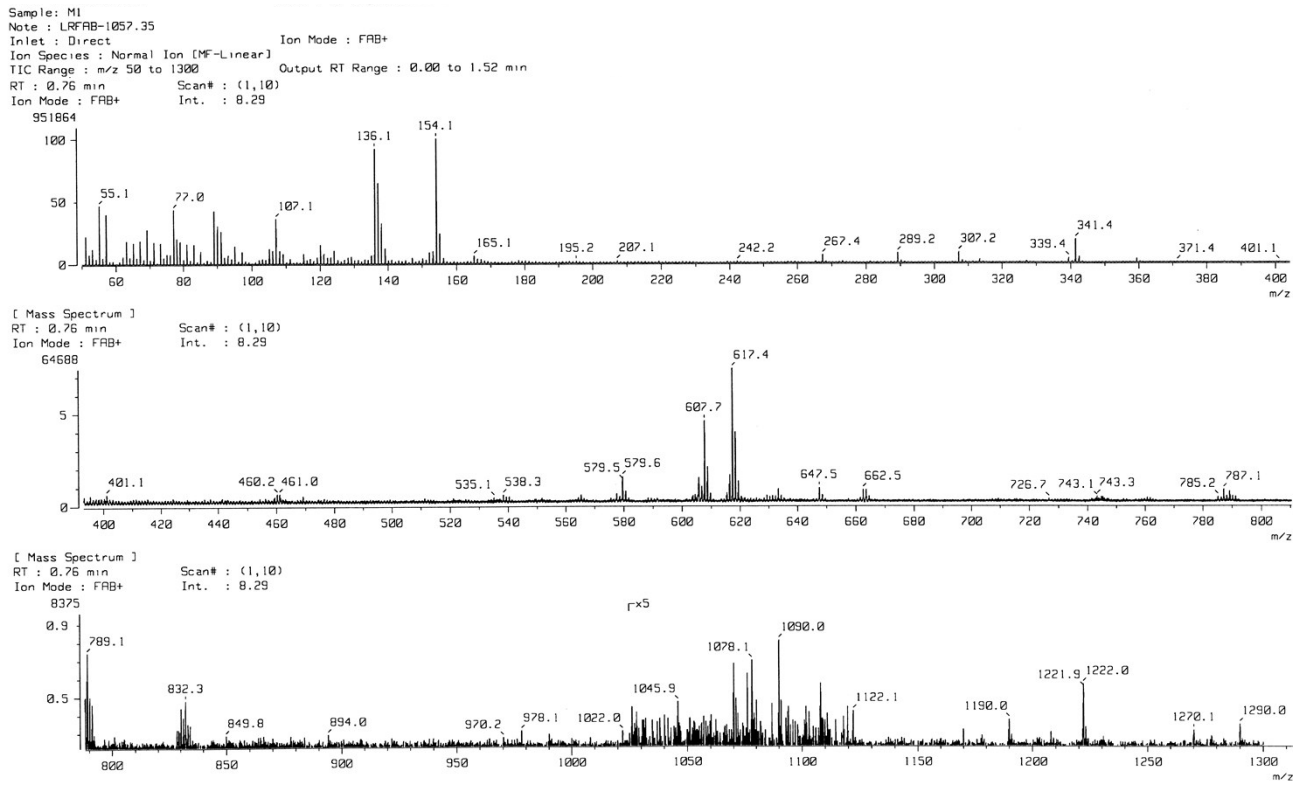

Fig. S4 FABMS spectrum of M1.

4. Cyclic voltammogram of P1

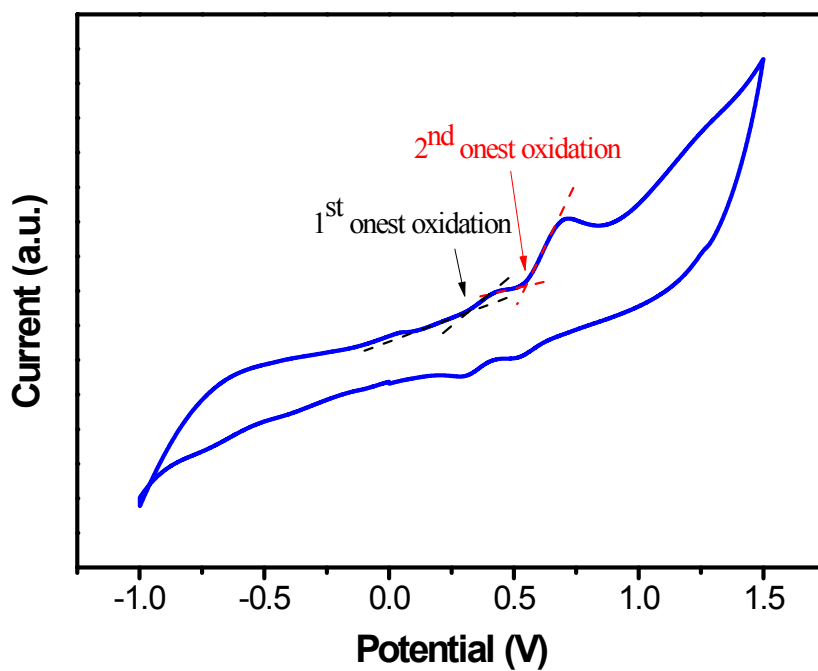

Fig. S5 Cyclic voltammogram of P1 in CH<sub>2</sub>Cl<sub>2</sub> at a scanning rate of 100 mV/s.

5. Typical optimized structure, HOMO, and LUMO

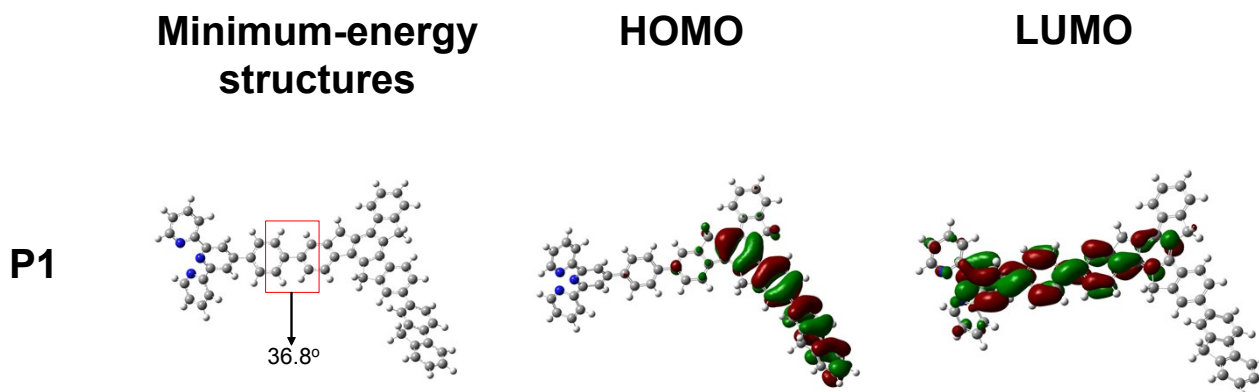

Fig. S6 The optimized structure, HOMO and LUMO of model compound calculated at B3LYP/6-31G\* level; the number is the dihedral angle in rectangular.
